# Supplementary material for: Non-target effects on soil microbial parameters of the synthetic pesticide carbendazim with the biopesticides cantharidin and norcantharidin
Source: PubMed Central journal article supplement (PMC5514074; doi:10.1038/s41598-017-05923-8), 2017-07-17
Supplement: 41598_2017_5923_MOESM1_ESM.pdf [file 41598_2017_5923_MOESM1_ESM.pdf]

**Non-target effects on soil microbial parameters of the synthetic pesticide  
carbendazim with the biopesticides cantharidin and norcantharidin**

Hainan Shao and Yalin Zhang\*

Key Laboratory of Plant Protection Resources and Pest Management, Ministry of  
Education, College of Plant Protection, Northwest A&F University, Yangling,  
Shaanxi 712100, China.

\*Corresponding author: [yalinzh@nwsuaf.edu.cn](mailto:yalinzh@nwsuaf.edu.cn)

**Table S1. Relationships between pesticide concentration and microbial parameters at each incubation time.**

| Parameter      | Day | CBA              |                | CTD              |                | NCTD             |                |
|----------------|-----|------------------|----------------|------------------|----------------|------------------|----------------|
|                |     | Regression       | r <sup>2</sup> | Regression       | r <sup>2</sup> | Regression       | r <sup>2</sup> |
| <b>INV</b>     | 3   | P=-0.07 C+73.965 | 0.0676         | P=-0.29 C+70.65  | 0.263          | P=-0.058•C+98.49 | 0.46           |
|                | 7   | P=-0.08•C+61.11  | 0.109          | P=-0.20•C+59.57  | 0.206          | P=-0.020•C+62.02 | 0.268          |
|                | 15  | P=-0.11•C+56.43  | 0.562          | P=-0.11•C+56.90  | 0.322          | P=-0.018•C+64.22 | 0.541          |
|                | 35  | P=-2.40•C+169.0  | 0.242          | P=-5.36•C+374.78 | 0.471          | P=-0.014•C+63.40 | 0.264          |
| <b>URE</b>     | 3   | P=-0.0009•C+4.39 | 0.030          | P=-0.0008•C+4.77 | 0.037          | P=-0.0002•C+4.38 | 0.074          |
|                | 7   | P=-0.004•C+4.10  | 0.843          | P=-0.0045•C+4.33 | 0.544          | P=-0.0003•C+4.12 | 0.204          |
|                | 15  | P=-0.0014•C+3.81 | 0.105          | P=-0.0078•C+4.51 | 0.282          | P=-0.004•C+4.10  | 0.054          |
|                | 35  | P=0.0076•C+3.41  | 0.71           | P=-0.0158•C+3.71 | 0.96           | P=-0.0004•C+3.64 | 0.68           |
| <b>ALK-PHO</b> | 3   | P=-0.019•C+7.04  | 0.16           | P=-0.016•C+9.36  | 0.49           | P=-0.0025•C+9.56 | 0.74           |
|                | 7   | P=0.0014•C+5.83  | 0.014          | P=0.0055•C+5.38  | 0.50           | P=-0.0002•C+5.39 | 0.20           |
|                | 15  | P=0.0044•C+6.62  | 0.18           | P=-0.019•C+6.18  | 0.97           | P=0.008•C+5.95   | 0.38           |
|                | 35  | P=-0.0012•C+7.52 | 0.21           | P=-0.003•C+7.84  | 0.26           | P=-0.0032•C+7.76 | 0.98           |
| <b>NEU-PHO</b> | 3   | P=-0.0016•C+3.05 | 0.60           | P=-0.0047•C+3.15 | 0.99           | P=-0.0003•C+2.86 | 0.15           |
|                | 7   | P=-0.0022•C+3.32 | 0.26           | P=-0.0053•C+2.98 | 0.12           | P=-0.0001•C+3.36 | 0.04           |
|                | 15  | P=-0.0006•C+3.53 | 0.05           | P=-0.0012•C+3.38 | 0.97           | P=0.0002•C+3.64  | 0.10           |
|                | 35  | P=0.0018•C+3.85  | 0.12           | P=-0.0022•C+3.8  | 0.41           | P=-0.0002•C+4.15 | 0.02           |

C: in mg kg<sup>-1</sup> DW soil; P: for units, see figures.

NEV: invertase activity; URE: urease activity; ALK-PHO: alkaline phosphatase activity; NEU-PHO: neutral phosphatase activity.

**Table S2. Analysis of variance for soil microbial parameters as affected by different factors and corresponding interactions.**

| <b>Factor</b> | <b>INE</b> | <b>URE</b> | <b>PHO-OH</b> | <b>PHO-NEU</b> | <b>H'-FUN</b> |
|---------------|------------|------------|---------------|----------------|---------------|
| <b>P</b>      | <0.001     | <0.001     | <0.001        | <0.001         | <0.001        |
| <b>C</b>      | <0.001     | <0.001     | <0.001        | <0.001         | <0.001        |
| <b>T</b>      | <0.001     | <0.001     | <0.001        | <0.001         | 0.13          |
| <b>P×C</b>    | -          | -          | -             | -              | -             |
| <b>P×T</b>    | 0.001      | 0.27       | 0.006         | <0.001         | 0.27          |
| <b>C×T</b>    | <0.001     | 0.15       | <0.001        | <0.001         | <0.001        |
| <b>P×C×T</b>  | -          | -          | --            | -              | -             |

P: type of pesticide; C: pesticide concentration; T: incubation time.

INE: invertase activity; URE: urease activity; PHO-OH: phosphatase alkaline; PHO-NEU: phosphatase neutral; H'-FUN: Shannon's index of fungal community diversity.
